# Supplementary material for: GDF15 Protects Insulin-Producing Beta Cells against Pro-Inflammatory Cytokines and Metabolic Stress via Increased Deamination of Intracellular Adenosine
Source: MDPI journal article supplement (doi:10.3390/ijms25020801), 2024-01-08
Supplement: s1 [file s1]

## Supplementary Figures

### Supplementary Figure S1

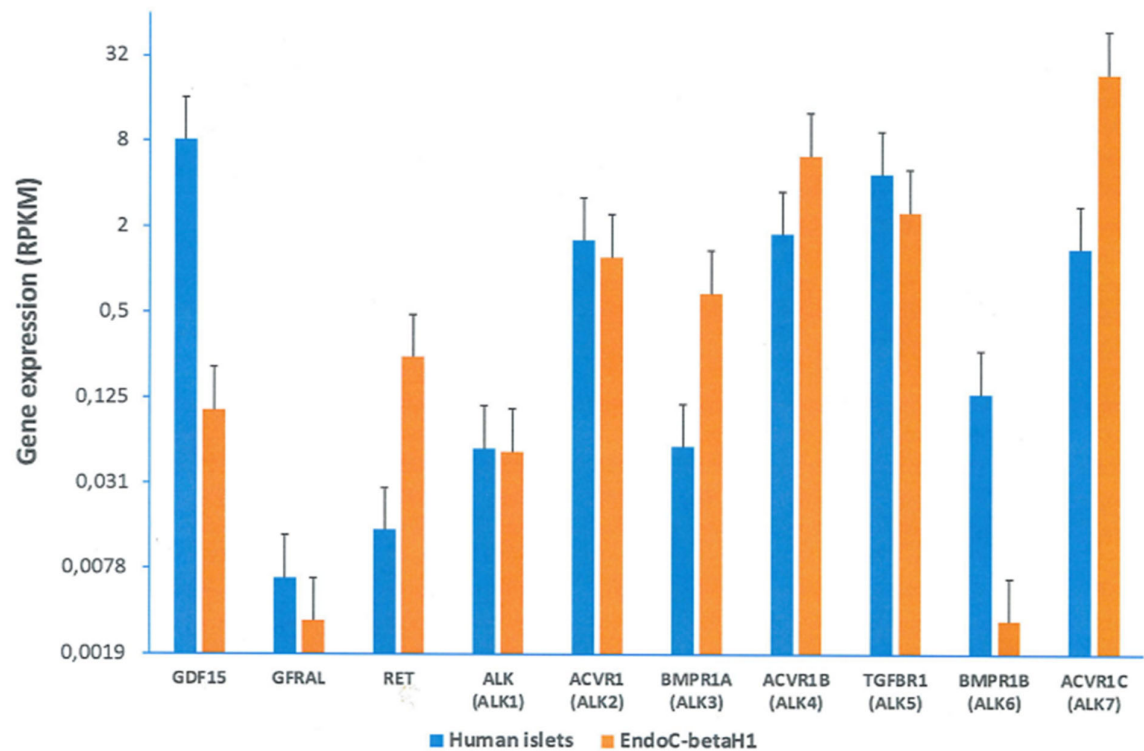

**Figure S1.** Expression of GDF15 and putative GDF15 receptors in human islets and EndoC-betaH1 cells. Gene expression levels were obtained by RNA-seq and data have been compiled from a previous publication [28]. Results are shown as mean RPKM  $\pm$  SEM (n=3).

Supplementary Figure S2

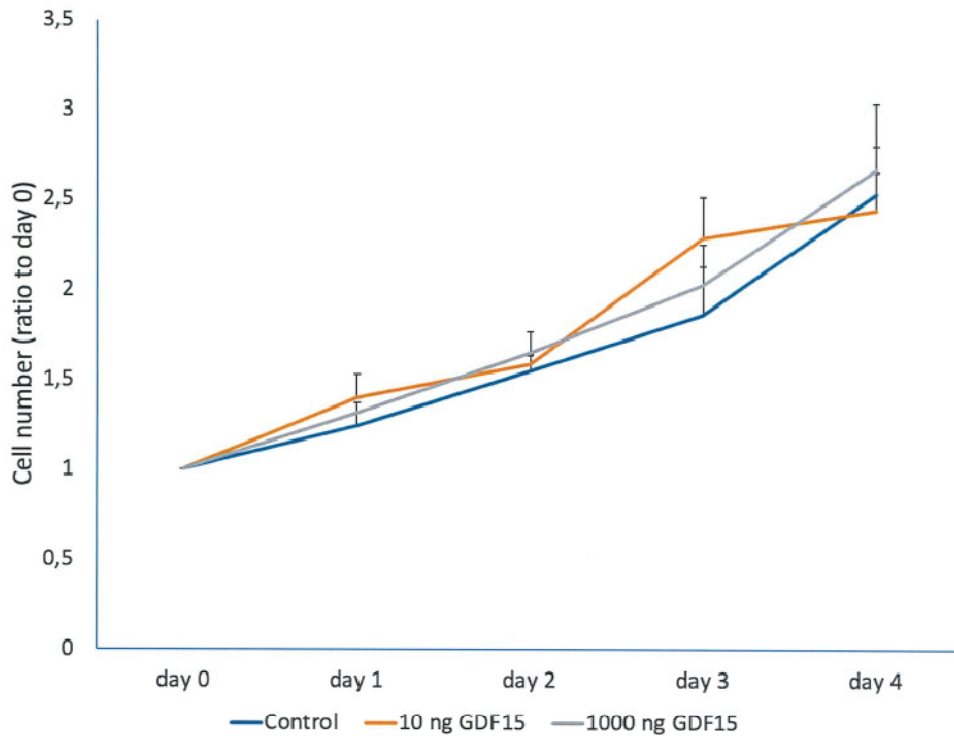

**Figure S2.** EndoC-betaH1 cell proliferation is not affected by GDF15. Cells were incubated without or with 10 ng/ml or 1000 ng/ml of GDF15 throughout the 4 days. Total cell numbers, at day 0, 1, 2, 3, and 4, were obtained by flow cytometry analysis. The ratios of day 1-4 to that on day 0 was analyzed and plotted. Results are mean  $\pm$  SEM from 6 independent experiments.
